# Supplementary material for: Characterization of Disease Patterns in Children with Intracranial Abscesses for Enhanced Clinical Decision-Making
Source: Preprints.org preprint supplement (doi:10.20944/preprints202410.0746.v1), 2024-10-10
Supplement: Supplementary file 1 [file supplementary]

## Sheet: Supp. Table 1
ICD-10 code	description	cross reference
A06.6	Amoebic brain abscess
A17.8†	Other tuberculosis of nervous system (incl. brain abscess)	G07*
A17.9†	Tuberculosis of nervous system, unspecified	G99.8*
A54.8	Other gonococcal infections	G07*
B43.1	Phaeomycotic brain abscess
B65.-	Schistosomiasis [bilharziasis]
B65.2	Schistosomiasis due to Schistosoma japonicum
B65.9	Schistosomiasis, unspecified
B69.0	Cysticercosis of central nervous system
G06.0	Intracranial abscess and granuloma
G06.2	Extradural and subdural abscess, unspecified
G07*	Intracranial and intraspinal abscess and granuloma in diseases classified elsewhere	A06.6
		A54.8
		A17.8
		B65.-

## Sheet: Supp. Table 2
feature1	feature2	Cramer's_V
male	female	1
sinusitis	spyogenes	1
mastoiditis	localpain	1
mastoiditis	abaumanii	1
otitis	vomiting	1
otitis	dizziness	1
otitis	ataxia	1
otitis	cerebellar	1
relapse	orbitalswelling	1
relapse	pathogenisolationnone	1
relapse	amoxicillinandclavulanicacid	1
localpain	abaumanii	1
fever	temporal	1
orbitalswelling	pathogenisolationnone	1
orbitalswelling	amoxicillinandclavulanicacid	1
vomiting	dizziness	1
vomiting	ataxia	1
vomiting	cerebellar	1
meningism	aaphropilus	1
dizziness	ataxia	1
dizziness	cerebellar	1
ataxia	cerebellar	1
mssa	clindamycine	1
ecorrodens	pnigrescens	1
pathogenisolationnone	amoxicillinandclavulanicacid	1
male	pathogenisolationbrain	0.790569
male	metronidazole	0.790569
female	pathogenisolationbrain	0.790569
female	metronidazole	0.790569
fever	frontalandfrontobasal	0.790569
frontalandfrontobasal	temporal	0.790569
adintegrum	clinicalresiduum	0.755929
clinicalresiduum	headache	0.755929
fever	flucloxacillin	0.755929
metronidazole	meropeneme	0.755929
flucloxacillin	temporal	0.755929
sinusitis	mastoiditis	0.661438
sinusitis	otitis	0.661438
sinusitis	localpain	0.661438
sinusitis	vomiting	0.661438
sinusitis	dizziness	0.661438
sinusitis	ataxia	0.661438
sinusitis	abaumanii	0.661438
sinusitis	cerebellar	0.661438
mastoiditis	localmastoiditis	0.661438
mastoiditis	spyogenes	0.661438
mastoiditis	flucloxacillin	0.661438
otitis	spyogenes	0.661438
otitis	meropeneme	0.661438
clinicalresiduum	meningism	0.661438
clinicalresiduum	ecorrodens	0.661438
clinicalresiduum	pnigrescens	0.661438
clinicalresiduum	aaphropilus	0.661438
pain	cons	0.661438
pain	meropeneme	0.661438
localpain	localmastoiditis	0.661438
localpain	spyogenes	0.661438
localpain	flucloxacillin	0.661438
localmastoiditis	mssa	0.661438
localmastoiditis	abaumanii	0.661438
localmastoiditis	clindamycine	0.661438
vomiting	spyogenes	0.661438
vomiting	meropeneme	0.661438
meningism	seizures	0.661438
meningism	flucloxacillin	0.661438
seizures	mssa	0.661438
seizures	aaphropilus	0.661438
seizures	clindamycine	0.661438
dizziness	spyogenes	0.661438
dizziness	meropeneme	0.661438
ataxia	spyogenes	0.661438
ataxia	meropeneme	0.661438
mssa	cefotaxime	0.661438
spyogenes	abaumanii	0.661438
spyogenes	cerebellar	0.661438
abaumanii	flucloxacillin	0.661438
aaphropilus	flucloxacillin	0.661438
meropeneme	cerebellar	0.661438
clindamycine	cefotaxime	0.661438
sangiosus	metronidazole	0.632456
ceftriaxone	metronidazole	0.632456
male	meropeneme	0.597614
female	meropeneme	0.597614
sinusitis	frontalandfrontobasal	0.597614
clinicalresiduum	sangiosus	0.597614
clinicalresiduum	ceftriaxone	0.597614
frontalswelling	sangiosus	0.597614
spyogenes	frontalandfrontobasal	0.597614
ceftriaxone	flucloxacillin	0.597614
flucloxacillin	frontalandfrontobasal	0.597614
vancomycine	meropeneme	0.597614
meropeneme	frontalandfrontobasal	0.597614
male	vancomycine	0.55
female	vancomycine	0.55
sangiosus	ceftriaxone	0.55
mastoiditis	fever	0.5
mastoiditis	temporal	0.5
otitis	headache	0.5
otitis	pathogenisolationbrain	0.5
otitis	pathogenisolationPCR	0.5
otitis	metronidazole	0.5
relapse	adintegrum	0.5
relapse	pathogenisolationbrain	0.5
relapse	metronidazole	0.5
adintegrum	orbitalswelling	0.5
adintegrum	headache	0.5
adintegrum	meningism	0.5
adintegrum	ecorrodens	0.5
adintegrum	pnigrescens	0.5
adintegrum	aaphropilus	0.5
adintegrum	pathogenisolationnone	0.5
adintegrum	amoxicillinandclavulanicacid	0.5
pain	fever	0.5
pain	metronidazole	0.5
pain	temporal	0.5
localpain	fever	0.5
localpain	temporal	0.5
fever	meningism	0.5
fever	abaumanii	0.5
fever	aaphropilus	0.5
fever	pathogenisolationbrain	0.5
orbitalswelling	pathogenisolationbrain	0.5
orbitalswelling	metronidazole	0.5
headache	vomiting	0.5
headache	meningism	0.5
headache	dizziness	0.5
headache	ataxia	0.5
headache	ecorrodens	0.5
headache	pnigrescens	0.5
headache	aaphropilus	0.5
headache	pathogenisolationPCR	0.5
headache	cerebellar	0.5
vomiting	pathogenisolationbrain	0.5
vomiting	pathogenisolationPCR	0.5
vomiting	metronidazole	0.5
meningism	pathogenisolationPCR	0.5
meningism	temporal	0.5
dizziness	pathogenisolationbrain	0.5
dizziness	pathogenisolationPCR	0.5
dizziness	metronidazole	0.5
ataxia	pathogenisolationbrain	0.5
ataxia	pathogenisolationPCR	0.5
ataxia	metronidazole	0.5
abaumanii	temporal	0.5
aaphropilus	pathogenisolationPCR	0.5
aaphropilus	temporal	0.5
pathogenisolationbrain	pathogenisolationPCR	0.5
pathogenisolationbrain	pathogenisolationnone	0.5
pathogenisolationbrain	amoxicillinandclavulanicacid	0.5
pathogenisolationbrain	metronidazole	0.5
pathogenisolationbrain	temporal	0.5
pathogenisolationbrain	cerebellar	0.5
pathogenisolationPCR	cerebellar	0.5
pathogenisolationnone	metronidazole	0.5
amoxicillinandclavulanicacid	metronidazole	0.5
metronidazole	cerebellar	0.5
male	clinicalresiduum	0.478091
male	localmastoiditis	0.478091
male	seizures	0.478091
male	flucloxacillin	0.478091
male	cefotaxime	0.478091
female	clinicalresiduum	0.478091
female	localmastoiditis	0.478091
female	seizures	0.478091
female	flucloxacillin	0.478091
female	cefotaxime	0.478091
sinusitis	sangiosus	0.478091
localmastoiditis	sangiosus	0.478091
localmastoiditis	vancomycine	0.478091
frontalswelling	frontalandfrontobasal	0.478091
seizures	vancomycine	0.478091
sangiosus	spyogenes	0.478091
sangiosus	meropeneme	0.478091
cons	ceftriaxone	0.478091
ceftriaxone	meropeneme	0.478091
ceftriaxone	cefotaxime	0.478091
flucloxacillin	vancomycine	0.478091
vancomycine	cefotaxime	0.478091
cefotaxime	frontalandfrontobasal	0.478091
male	otitis	0.395285
male	relapse	0.395285
male	pain	0.395285
male	orbitalswelling	0.395285
male	vomiting	0.395285
male	dizziness	0.395285
male	ataxia	0.395285
male	pathogenisolationnone	0.395285
male	amoxicillinandclavulanicacid	0.395285
male	cerebellar	0.395285
female	otitis	0.395285
female	relapse	0.395285
female	pain	0.395285
female	orbitalswelling	0.395285
female	vomiting	0.395285
female	dizziness	0.395285
female	ataxia	0.395285
female	pathogenisolationnone	0.395285
female	amoxicillinandclavulanicacid	0.395285
female	cerebellar	0.395285
mastoiditis	ceftriaxone	0.395285
mastoiditis	frontalandfrontobasal	0.395285
otitis	vancomycine	0.395285
otitis	frontalandfrontobasal	0.395285
pain	vancomycine	0.395285
pain	frontalandfrontobasal	0.395285
localpain	ceftriaxone	0.395285
localpain	frontalandfrontobasal	0.395285
vomiting	vancomycine	0.395285
vomiting	frontalandfrontobasal	0.395285
meningism	sangiosus	0.395285
meningism	ceftriaxone	0.395285
meningism	frontalandfrontobasal	0.395285
dizziness	vancomycine	0.395285
dizziness	frontalandfrontobasal	0.395285
ataxia	vancomycine	0.395285
ataxia	frontalandfrontobasal	0.395285
sangiosus	ecorrodens	0.395285
sangiosus	pnigrescens	0.395285
sangiosus	aaphropilus	0.395285
ecorrodens	ceftriaxone	0.395285
ecorrodens	vancomycine	0.395285
pnigrescens	ceftriaxone	0.395285
pnigrescens	vancomycine	0.395285
abaumanii	ceftriaxone	0.395285
abaumanii	frontalandfrontobasal	0.395285
aaphropilus	ceftriaxone	0.395285
aaphropilus	frontalandfrontobasal	0.395285
vancomycine	cerebellar	0.395285
frontalandfrontobasal	cerebellar	0.395285
sinusitis	adintegrum	0.377964
adintegrum	localmastoiditis	0.377964
adintegrum	frontalswelling	0.377964
adintegrum	cons	0.377964
adintegrum	spyogenes	0.377964
adintegrum	meropeneme	0.377964
adintegrum	cefotaxime	0.377964
clinicalresiduum	pathogenisolationbrain	0.377964
clinicalresiduum	metronidazole	0.377964
localmastoiditis	headache	0.377964
localmastoiditis	pathogenisolationbrain	0.377964
localmastoiditis	pathogenisolationPCR	0.377964
localmastoiditis	metronidazole	0.377964
fever	frontalswelling	0.377964
fever	cefotaxime	0.377964
frontalswelling	headache	0.377964
frontalswelling	metronidazole	0.377964
frontalswelling	temporal	0.377964
headache	cons	0.377964
headache	cefotaxime	0.377964
seizures	pathogenisolationbrain	0.377964
seizures	metronidazole	0.377964
cons	pathogenisolationbrain	0.377964
cons	pathogenisolationPCR	0.377964
pathogenisolationbrain	flucloxacillin	0.377964
pathogenisolationbrain	cefotaxime	0.377964
pathogenisolationPCR	cefotaxime	0.377964
metronidazole	flucloxacillin	0.377964
metronidazole	cefotaxime	0.377964
cefotaxime	temporal	0.377964
sinusitis	localmastoiditis	0.357143
sinusitis	flucloxacillin	0.357143
sinusitis	meropeneme	0.357143
clinicalresiduum	seizures	0.357143
clinicalresiduum	flucloxacillin	0.357143
localmastoiditis	seizures	0.357143
localmastoiditis	spyogenes	0.357143
localmastoiditis	flucloxacillin	0.357143
localmastoiditis	cefotaxime	0.357143
frontalswelling	cons	0.357143
frontalswelling	cefotaxime	0.357143
seizures	flucloxacillin	0.357143
seizures	cefotaxime	0.357143
cons	meropeneme	0.357143
cons	cefotaxime	0.357143
spyogenes	flucloxacillin	0.357143
spyogenes	meropeneme	0.357143
male	sangiosus	0.35
male	ceftriaxone	0.35
female	sangiosus	0.35
female	ceftriaxone	0.35
sangiosus	frontalandfrontobasal	0.35
male	mastoiditis	0.316228
male	localpain	0.316228
male	meningism	0.316228
male	mssa	0.316228
male	ecorrodens	0.316228
male	pnigrescens	0.316228
male	abaumanii	0.316228
male	aaphropilus	0.316228
male	pathogenisolationPCR	0.316228
male	clindamycine	0.316228
female	mastoiditis	0.316228
female	localpain	0.316228
female	meningism	0.316228
female	mssa	0.316228
female	ecorrodens	0.316228
female	pnigrescens	0.316228
female	abaumanii	0.316228
female	aaphropilus	0.316228
female	pathogenisolationPCR	0.316228
female	clindamycine	0.316228
mastoiditis	sangiosus	0.316228
mastoiditis	vancomycine	0.316228
otitis	sangiosus	0.316228
otitis	ceftriaxone	0.316228
relapse	sangiosus	0.316228
relapse	ceftriaxone	0.316228
relapse	vancomycine	0.316228
relapse	frontalandfrontobasal	0.316228
adintegrum	sangiosus	0.316228
adintegrum	ceftriaxone	0.316228
pain	sangiosus	0.316228
pain	ceftriaxone	0.316228
localpain	sangiosus	0.316228
localpain	vancomycine	0.316228
fever	ceftriaxone	0.316228
orbitalswelling	sangiosus	0.316228
orbitalswelling	ceftriaxone	0.316228
orbitalswelling	vancomycine	0.316228
orbitalswelling	frontalandfrontobasal	0.316228
headache	sangiosus	0.316228
headache	ceftriaxone	0.316228
headache	vancomycine	0.316228
headache	frontalandfrontobasal	0.316228
vomiting	sangiosus	0.316228
vomiting	ceftriaxone	0.316228
meningism	vancomycine	0.316228
dizziness	sangiosus	0.316228
dizziness	ceftriaxone	0.316228
ataxia	sangiosus	0.316228
ataxia	ceftriaxone	0.316228
sangiosus	mssa	0.316228
sangiosus	abaumanii	0.316228
sangiosus	pathogenisolationPCR	0.316228
sangiosus	pathogenisolationnone	0.316228
sangiosus	amoxicillinandclavulanicacid	0.316228
sangiosus	clindamycine	0.316228
sangiosus	cerebellar	0.316228
mssa	ceftriaxone	0.316228
mssa	vancomycine	0.316228
mssa	frontalandfrontobasal	0.316228
ecorrodens	frontalandfrontobasal	0.316228
pnigrescens	frontalandfrontobasal	0.316228
abaumanii	vancomycine	0.316228
aaphropilus	vancomycine	0.316228
pathogenisolationbrain	vancomycine	0.316228
pathogenisolationPCR	ceftriaxone	0.316228
pathogenisolationPCR	vancomycine	0.316228
pathogenisolationPCR	frontalandfrontobasal	0.316228
pathogenisolationnone	ceftriaxone	0.316228
pathogenisolationnone	vancomycine	0.316228
pathogenisolationnone	frontalandfrontobasal	0.316228
amoxicillinandclavulanicacid	ceftriaxone	0.316228
amoxicillinandclavulanicacid	vancomycine	0.316228
amoxicillinandclavulanicacid	frontalandfrontobasal	0.316228
ceftriaxone	clindamycine	0.316228
ceftriaxone	temporal	0.316228
ceftriaxone	cerebellar	0.316228
metronidazole	vancomycine	0.316228
metronidazole	frontalandfrontobasal	0.316228
vancomycine	clindamycine	0.316228
clindamycine	frontalandfrontobasal	0.316228
sinusitis	clinicalresiduum	0.285714
sinusitis	frontalswelling	0.285714
sinusitis	seizures	0.285714
sinusitis	cons	0.285714
sinusitis	cefotaxime	0.285714
clinicalresiduum	localmastoiditis	0.285714
clinicalresiduum	frontalswelling	0.285714
clinicalresiduum	cons	0.285714
clinicalresiduum	spyogenes	0.285714
clinicalresiduum	meropeneme	0.285714
clinicalresiduum	cefotaxime	0.285714
localmastoiditis	frontalswelling	0.285714
localmastoiditis	cons	0.285714
localmastoiditis	meropeneme	0.285714
frontalswelling	seizures	0.285714
frontalswelling	spyogenes	0.285714
frontalswelling	flucloxacillin	0.285714
frontalswelling	meropeneme	0.285714
seizures	cons	0.285714
seizures	spyogenes	0.285714
seizures	meropeneme	0.285714
cons	spyogenes	0.285714
cons	flucloxacillin	0.285714
spyogenes	cefotaxime	0.285714
flucloxacillin	meropeneme	0.285714
flucloxacillin	cefotaxime	0.285714
meropeneme	cefotaxime	0.285714
mastoiditis	adintegrum	0.25
mastoiditis	headache	0.25
mastoiditis	pathogenisolationbrain	0.25
mastoiditis	pathogenisolationPCR	0.25
mastoiditis	metronidazole	0.25
otitis	adintegrum	0.25
otitis	fever	0.25
otitis	temporal	0.25
relapse	fever	0.25
relapse	headache	0.25
relapse	pathogenisolationPCR	0.25
relapse	temporal	0.25
adintegrum	pain	0.25
adintegrum	localpain	0.25
adintegrum	vomiting	0.25
adintegrum	dizziness	0.25
adintegrum	ataxia	0.25
adintegrum	mssa	0.25
adintegrum	abaumanii	0.25
adintegrum	clindamycine	0.25
adintegrum	cerebellar	0.25
pain	headache	0.25
pain	pathogenisolationbrain	0.25
pain	pathogenisolationPCR	0.25
localpain	headache	0.25
localpain	pathogenisolationbrain	0.25
localpain	pathogenisolationPCR	0.25
localpain	metronidazole	0.25
fever	orbitalswelling	0.25
fever	vomiting	0.25
fever	dizziness	0.25
fever	ataxia	0.25
fever	mssa	0.25
fever	ecorrodens	0.25
fever	pnigrescens	0.25
fever	pathogenisolationnone	0.25
fever	amoxicillinandclavulanicacid	0.25
fever	clindamycine	0.25
fever	cerebellar	0.25
orbitalswelling	headache	0.25
orbitalswelling	pathogenisolationPCR	0.25
orbitalswelling	temporal	0.25
headache	mssa	0.25
headache	abaumanii	0.25
headache	pathogenisolationnone	0.25
headache	amoxicillinandclavulanicacid	0.25
headache	clindamycine	0.25
vomiting	temporal	0.25
meningism	pathogenisolationbrain	0.25
meningism	metronidazole	0.25
dizziness	temporal	0.25
ataxia	temporal	0.25
mssa	pathogenisolationbrain	0.25
mssa	pathogenisolationPCR	0.25
mssa	metronidazole	0.25
mssa	temporal	0.25
ecorrodens	pathogenisolationbrain	0.25
ecorrodens	pathogenisolationPCR	0.25
ecorrodens	metronidazole	0.25
ecorrodens	temporal	0.25
pnigrescens	pathogenisolationbrain	0.25
pnigrescens	pathogenisolationPCR	0.25
pnigrescens	metronidazole	0.25
pnigrescens	temporal	0.25
abaumanii	pathogenisolationbrain	0.25
abaumanii	pathogenisolationPCR	0.25
abaumanii	metronidazole	0.25
aaphropilus	pathogenisolationbrain	0.25
aaphropilus	metronidazole	0.25
pathogenisolationbrain	clindamycine	0.25
pathogenisolationPCR	pathogenisolationnone	0.25
pathogenisolationPCR	amoxicillinandclavulanicacid	0.25
pathogenisolationPCR	clindamycine	0.25
pathogenisolationnone	temporal	0.25
amoxicillinandclavulanicacid	temporal	0.25
metronidazole	clindamycine	0.25
clindamycine	temporal	0.25
temporal	cerebellar	0.25
sinusitis	relapse	0.188982
sinusitis	pain	0.188982
sinusitis	fever	0.188982
sinusitis	orbitalswelling	0.188982
sinusitis	headache	0.188982
sinusitis	meningism	0.188982
sinusitis	mssa	0.188982
sinusitis	ecorrodens	0.188982
sinusitis	pnigrescens	0.188982
sinusitis	aaphropilus	0.188982
sinusitis	pathogenisolationbrain	0.188982
sinusitis	pathogenisolationPCR	0.188982
sinusitis	pathogenisolationnone	0.188982
sinusitis	amoxicillinandclavulanicacid	0.188982
sinusitis	metronidazole	0.188982
sinusitis	clindamycine	0.188982
sinusitis	temporal	0.188982
mastoiditis	clinicalresiduum	0.188982
mastoiditis	frontalswelling	0.188982
mastoiditis	seizures	0.188982
mastoiditis	cons	0.188982
mastoiditis	meropeneme	0.188982
mastoiditis	cefotaxime	0.188982
otitis	clinicalresiduum	0.188982
otitis	localmastoiditis	0.188982
otitis	frontalswelling	0.188982
otitis	seizures	0.188982
otitis	cons	0.188982
otitis	flucloxacillin	0.188982
otitis	cefotaxime	0.188982
relapse	clinicalresiduum	0.188982
relapse	localmastoiditis	0.188982
relapse	frontalswelling	0.188982
relapse	seizures	0.188982
relapse	cons	0.188982
relapse	spyogenes	0.188982
relapse	flucloxacillin	0.188982
relapse	meropeneme	0.188982
relapse	cefotaxime	0.188982
adintegrum	seizures	0.188982
adintegrum	flucloxacillin	0.188982
clinicalresiduum	pain	0.188982
clinicalresiduum	localpain	0.188982
clinicalresiduum	fever	0.188982
clinicalresiduum	orbitalswelling	0.188982
clinicalresiduum	vomiting	0.188982
clinicalresiduum	dizziness	0.188982
clinicalresiduum	ataxia	0.188982
clinicalresiduum	mssa	0.188982
clinicalresiduum	abaumanii	0.188982
clinicalresiduum	pathogenisolationPCR	0.188982
clinicalresiduum	pathogenisolationnone	0.188982
clinicalresiduum	amoxicillinandclavulanicacid	0.188982
clinicalresiduum	clindamycine	0.188982
clinicalresiduum	temporal	0.188982
clinicalresiduum	cerebellar	0.188982
pain	localmastoiditis	0.188982
pain	frontalswelling	0.188982
pain	seizures	0.188982
pain	spyogenes	0.188982
pain	flucloxacillin	0.188982
pain	cefotaxime	0.188982
localpain	frontalswelling	0.188982
localpain	seizures	0.188982
localpain	cons	0.188982
localpain	meropeneme	0.188982
localpain	cefotaxime	0.188982
localmastoiditis	fever	0.188982
localmastoiditis	orbitalswelling	0.188982
localmastoiditis	vomiting	0.188982
localmastoiditis	meningism	0.188982
localmastoiditis	dizziness	0.188982
localmastoiditis	ataxia	0.188982
localmastoiditis	ecorrodens	0.188982
localmastoiditis	pnigrescens	0.188982
localmastoiditis	aaphropilus	0.188982
localmastoiditis	pathogenisolationnone	0.188982
localmastoiditis	amoxicillinandclavulanicacid	0.188982
localmastoiditis	temporal	0.188982
localmastoiditis	cerebellar	0.188982
fever	seizures	0.188982
fever	cons	0.188982
fever	spyogenes	0.188982
fever	meropeneme	0.188982
orbitalswelling	frontalswelling	0.188982
orbitalswelling	seizures	0.188982
orbitalswelling	cons	0.188982
orbitalswelling	spyogenes	0.188982
orbitalswelling	flucloxacillin	0.188982
orbitalswelling	meropeneme	0.188982
orbitalswelling	cefotaxime	0.188982
frontalswelling	vomiting	0.188982
frontalswelling	meningism	0.188982
frontalswelling	dizziness	0.188982
frontalswelling	ataxia	0.188982
frontalswelling	mssa	0.188982
frontalswelling	ecorrodens	0.188982
frontalswelling	pnigrescens	0.188982
frontalswelling	abaumanii	0.188982
frontalswelling	aaphropilus	0.188982
frontalswelling	pathogenisolationbrain	0.188982
frontalswelling	pathogenisolationPCR	0.188982
frontalswelling	pathogenisolationnone	0.188982
frontalswelling	amoxicillinandclavulanicacid	0.188982
frontalswelling	clindamycine	0.188982
frontalswelling	cerebellar	0.188982
headache	seizures	0.188982
headache	spyogenes	0.188982
headache	flucloxacillin	0.188982
headache	meropeneme	0.188982
vomiting	seizures	0.188982
vomiting	cons	0.188982
vomiting	flucloxacillin	0.188982
vomiting	cefotaxime	0.188982
meningism	cons	0.188982
meningism	spyogenes	0.188982
meningism	meropeneme	0.188982
meningism	cefotaxime	0.188982
seizures	dizziness	0.188982
seizures	ataxia	0.188982
seizures	ecorrodens	0.188982
seizures	pnigrescens	0.188982
seizures	abaumanii	0.188982
seizures	pathogenisolationPCR	0.188982
seizures	pathogenisolationnone	0.188982
seizures	amoxicillinandclavulanicacid	0.188982
seizures	temporal	0.188982
seizures	cerebellar	0.188982
dizziness	cons	0.188982
dizziness	flucloxacillin	0.188982
dizziness	cefotaxime	0.188982
ataxia	cons	0.188982
ataxia	flucloxacillin	0.188982
ataxia	cefotaxime	0.188982
mssa	cons	0.188982
mssa	spyogenes	0.188982
mssa	flucloxacillin	0.188982
mssa	meropeneme	0.188982
cons	ecorrodens	0.188982
cons	pnigrescens	0.188982
cons	abaumanii	0.188982
cons	aaphropilus	0.188982
cons	pathogenisolationnone	0.188982
cons	amoxicillinandclavulanicacid	0.188982
cons	metronidazole	0.188982
cons	clindamycine	0.188982
cons	temporal	0.188982
cons	cerebellar	0.188982
ecorrodens	spyogenes	0.188982
ecorrodens	flucloxacillin	0.188982
ecorrodens	meropeneme	0.188982
ecorrodens	cefotaxime	0.188982
pnigrescens	spyogenes	0.188982
pnigrescens	flucloxacillin	0.188982
pnigrescens	meropeneme	0.188982
pnigrescens	cefotaxime	0.188982
spyogenes	aaphropilus	0.188982
spyogenes	pathogenisolationbrain	0.188982
spyogenes	pathogenisolationPCR	0.188982
spyogenes	pathogenisolationnone	0.188982
spyogenes	amoxicillinandclavulanicacid	0.188982
spyogenes	metronidazole	0.188982
spyogenes	clindamycine	0.188982
spyogenes	temporal	0.188982
abaumanii	meropeneme	0.188982
abaumanii	cefotaxime	0.188982
aaphropilus	meropeneme	0.188982
aaphropilus	cefotaxime	0.188982
pathogenisolationbrain	meropeneme	0.188982
pathogenisolationPCR	flucloxacillin	0.188982
pathogenisolationPCR	meropeneme	0.188982
pathogenisolationnone	flucloxacillin	0.188982
pathogenisolationnone	meropeneme	0.188982
pathogenisolationnone	cefotaxime	0.188982
amoxicillinandclavulanicacid	flucloxacillin	0.188982
amoxicillinandclavulanicacid	meropeneme	0.188982
amoxicillinandclavulanicacid	cefotaxime	0.188982
flucloxacillin	clindamycine	0.188982
flucloxacillin	cerebellar	0.188982
meropeneme	clindamycine	0.188982
meropeneme	temporal	0.188982
cefotaxime	cerebellar	0.188982
male	adintegrum	0.158114
male	fever	0.158114
male	headache	0.158114
male	temporal	0.158114
female	adintegrum	0.158114
female	fever	0.158114
female	headache	0.158114
female	temporal	0.158114
adintegrum	vancomycine	0.158114
adintegrum	frontalandfrontobasal	0.158114
fever	sangiosus	0.158114
fever	vancomycine	0.158114
sangiosus	pathogenisolationbrain	0.158114
sangiosus	temporal	0.158114
pathogenisolationbrain	ceftriaxone	0.158114
pathogenisolationbrain	frontalandfrontobasal	0.158114
vancomycine	temporal	0.158114
mastoiditis	otitis	0.125
mastoiditis	relapse	0.125
mastoiditis	pain	0.125
mastoiditis	orbitalswelling	0.125
mastoiditis	vomiting	0.125
mastoiditis	meningism	0.125
mastoiditis	dizziness	0.125
mastoiditis	ataxia	0.125
mastoiditis	mssa	0.125
mastoiditis	ecorrodens	0.125
mastoiditis	pnigrescens	0.125
mastoiditis	aaphropilus	0.125
mastoiditis	pathogenisolationnone	0.125
mastoiditis	amoxicillinandclavulanicacid	0.125
mastoiditis	clindamycine	0.125
mastoiditis	cerebellar	0.125
otitis	relapse	0.125
otitis	pain	0.125
otitis	localpain	0.125
otitis	orbitalswelling	0.125
otitis	meningism	0.125
otitis	mssa	0.125
otitis	ecorrodens	0.125
otitis	pnigrescens	0.125
otitis	abaumanii	0.125
otitis	aaphropilus	0.125
otitis	pathogenisolationnone	0.125
otitis	amoxicillinandclavulanicacid	0.125
otitis	clindamycine	0.125
relapse	pain	0.125
relapse	localpain	0.125
relapse	vomiting	0.125
relapse	meningism	0.125
relapse	dizziness	0.125
relapse	ataxia	0.125
relapse	mssa	0.125
relapse	ecorrodens	0.125
relapse	pnigrescens	0.125
relapse	abaumanii	0.125
relapse	aaphropilus	0.125
relapse	clindamycine	0.125
relapse	cerebellar	0.125
pain	localpain	0.125
pain	orbitalswelling	0.125
pain	vomiting	0.125
pain	meningism	0.125
pain	dizziness	0.125
pain	ataxia	0.125
pain	mssa	0.125
pain	ecorrodens	0.125
pain	pnigrescens	0.125
pain	abaumanii	0.125
pain	aaphropilus	0.125
pain	pathogenisolationnone	0.125
pain	amoxicillinandclavulanicacid	0.125
pain	clindamycine	0.125
pain	cerebellar	0.125
localpain	orbitalswelling	0.125
localpain	vomiting	0.125
localpain	meningism	0.125
localpain	dizziness	0.125
localpain	ataxia	0.125
localpain	mssa	0.125
localpain	ecorrodens	0.125
localpain	pnigrescens	0.125
localpain	aaphropilus	0.125
localpain	pathogenisolationnone	0.125
localpain	amoxicillinandclavulanicacid	0.125
localpain	clindamycine	0.125
localpain	cerebellar	0.125
orbitalswelling	vomiting	0.125
orbitalswelling	meningism	0.125
orbitalswelling	dizziness	0.125
orbitalswelling	ataxia	0.125
orbitalswelling	mssa	0.125
orbitalswelling	ecorrodens	0.125
orbitalswelling	pnigrescens	0.125
orbitalswelling	abaumanii	0.125
orbitalswelling	aaphropilus	0.125
orbitalswelling	clindamycine	0.125
orbitalswelling	cerebellar	0.125
vomiting	meningism	0.125
vomiting	mssa	0.125
vomiting	ecorrodens	0.125
vomiting	pnigrescens	0.125
vomiting	abaumanii	0.125
vomiting	aaphropilus	0.125
vomiting	pathogenisolationnone	0.125
vomiting	amoxicillinandclavulanicacid	0.125
vomiting	clindamycine	0.125
meningism	dizziness	0.125
meningism	ataxia	0.125
meningism	mssa	0.125
meningism	ecorrodens	0.125
meningism	pnigrescens	0.125
meningism	abaumanii	0.125
meningism	pathogenisolationnone	0.125
meningism	amoxicillinandclavulanicacid	0.125
meningism	clindamycine	0.125
meningism	cerebellar	0.125
dizziness	mssa	0.125
dizziness	ecorrodens	0.125
dizziness	pnigrescens	0.125
dizziness	abaumanii	0.125
dizziness	aaphropilus	0.125
dizziness	pathogenisolationnone	0.125
dizziness	amoxicillinandclavulanicacid	0.125
dizziness	clindamycine	0.125
ataxia	mssa	0.125
ataxia	ecorrodens	0.125
ataxia	pnigrescens	0.125
ataxia	abaumanii	0.125
ataxia	aaphropilus	0.125
ataxia	pathogenisolationnone	0.125
ataxia	amoxicillinandclavulanicacid	0.125
ataxia	clindamycine	0.125
mssa	ecorrodens	0.125
mssa	pnigrescens	0.125
mssa	abaumanii	0.125
mssa	aaphropilus	0.125
mssa	pathogenisolationnone	0.125
mssa	amoxicillinandclavulanicacid	0.125
mssa	cerebellar	0.125
ecorrodens	abaumanii	0.125
ecorrodens	aaphropilus	0.125
ecorrodens	pathogenisolationnone	0.125
ecorrodens	amoxicillinandclavulanicacid	0.125
ecorrodens	clindamycine	0.125
ecorrodens	cerebellar	0.125
pnigrescens	abaumanii	0.125
pnigrescens	aaphropilus	0.125
pnigrescens	pathogenisolationnone	0.125
pnigrescens	amoxicillinandclavulanicacid	0.125
pnigrescens	clindamycine	0.125
pnigrescens	cerebellar	0.125
abaumanii	aaphropilus	0.125
abaumanii	pathogenisolationnone	0.125
abaumanii	amoxicillinandclavulanicacid	0.125
abaumanii	clindamycine	0.125
abaumanii	cerebellar	0.125
aaphropilus	pathogenisolationnone	0.125
aaphropilus	amoxicillinandclavulanicacid	0.125
aaphropilus	clindamycine	0.125
aaphropilus	cerebellar	0.125
pathogenisolationnone	clindamycine	0.125
pathogenisolationnone	cerebellar	0.125
amoxicillinandclavulanicacid	clindamycine	0.125
amoxicillinandclavulanicacid	cerebellar	0.125
clindamycine	cerebellar	0.125
male	frontalandfrontobasal	0.1
female	frontalandfrontobasal	0.1
sangiosus	vancomycine	0.1
ceftriaxone	vancomycine	0.1
ceftriaxone	frontalandfrontobasal	0.1
vancomycine	frontalandfrontobasal	0.1
male	sinusitis	0.0597614
male	frontalswelling	0.0597614
male	cons	0.0597614
male	spyogenes	0.0597614
female	sinusitis	0.0597614
female	frontalswelling	0.0597614
female	cons	0.0597614
female	spyogenes	0.0597614
sinusitis	ceftriaxone	0.0597614
sinusitis	vancomycine	0.0597614
clinicalresiduum	vancomycine	0.0597614
clinicalresiduum	frontalandfrontobasal	0.0597614
localmastoiditis	ceftriaxone	0.0597614
localmastoiditis	frontalandfrontobasal	0.0597614
frontalswelling	ceftriaxone	0.0597614
frontalswelling	vancomycine	0.0597614
seizures	sangiosus	0.0597614
seizures	ceftriaxone	0.0597614
seizures	frontalandfrontobasal	0.0597614
sangiosus	cons	0.0597614
sangiosus	flucloxacillin	0.0597614
sangiosus	cefotaxime	0.0597614
cons	vancomycine	0.0597614
cons	frontalandfrontobasal	0.0597614
spyogenes	ceftriaxone	0.0597614
spyogenes	vancomycine	0.0597614
adintegrum	fever	0
adintegrum	pathogenisolationbrain	0
adintegrum	pathogenisolationPCR	0
adintegrum	metronidazole	0
adintegrum	temporal	0
fever	headache	0
fever	pathogenisolationPCR	0
fever	metronidazole	0
headache	pathogenisolationbrain	0
headache	metronidazole	0
headache	temporal	0
pathogenisolationPCR	metronidazole	0
pathogenisolationPCR	temporal	0
metronidazole	temporal	0

## Sheet: Supp. Table 3
feature combination	Cramer's_V	significancy fisher's exact test
male vs female	1.0	0.007936508
sinusitis vs spyogenes	1.0	0.027777778
fever vs temporal	1.0	0.011904762
male vs pathogenisolationbrain	0.7905694	0.047619048
male vs metronidazole	0.7905694	0.047619048
female vs pathogenisolationbrain	0.7905694	0.047619048
female vs metronidazole	0.7905694	0.047619048
fever vs frontalandfrontobasal	0.7905694	0.047619048
frontalandfrontobasal vs temporal	0.7905694	0.047619048
